# Supplementary material
Source: publisher figshare collection journal article supplement (https://brill.figshare.com/ndownloader/files/24981671)
Supplement: Supplementary file 1 [file 24981671]

# **The Relationship between Illusory Crescents and the Stream/Bounce Effect**

**Emily J. A-Izzeddin \* and Philip M. Grove**

School of Psychology, The University of Queensland, St Lucia, QLD, 4072, Australia

Received 18 June 2020; accepted 5 October 2020

\* To whom correspondence should be addressed. E-mail: [ej.aizzeddin@gmail.com](mailto:ej.aizzeddin@gmail.com)

**Supplementary Material**

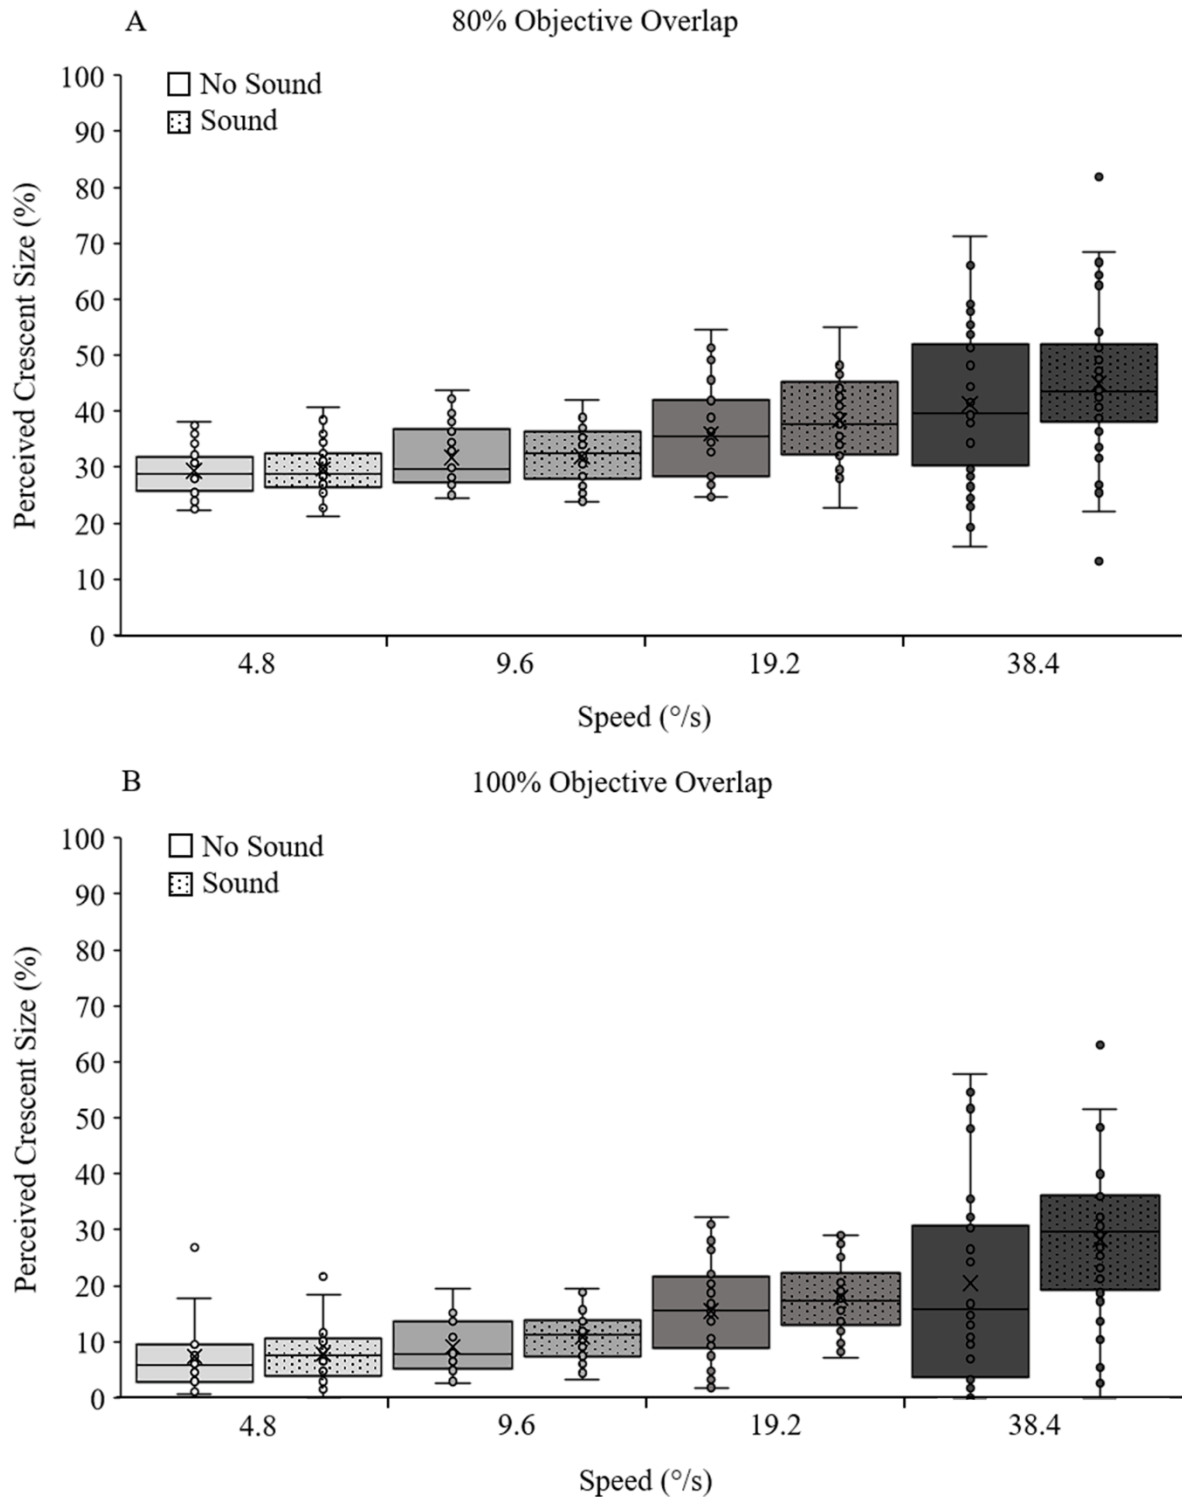

**Figure S1.** Box and whisker plots of data in Experiment 1. Boxes represent the interquartile range; middle line represents the median; whiskers represent highest and lowest scores (excluding outliers); and X's represent the mean. (A) Perceived crescent size as a function of speed and sound presence at 80% objective overlap. (B) Perceived crescent size as a function

of speed and sound presence at 100% objective overlap. Solid boxes represent no-sound conditions, speckled boxes represent sound conditions. Dots represent individual data points (some may be overlapping).

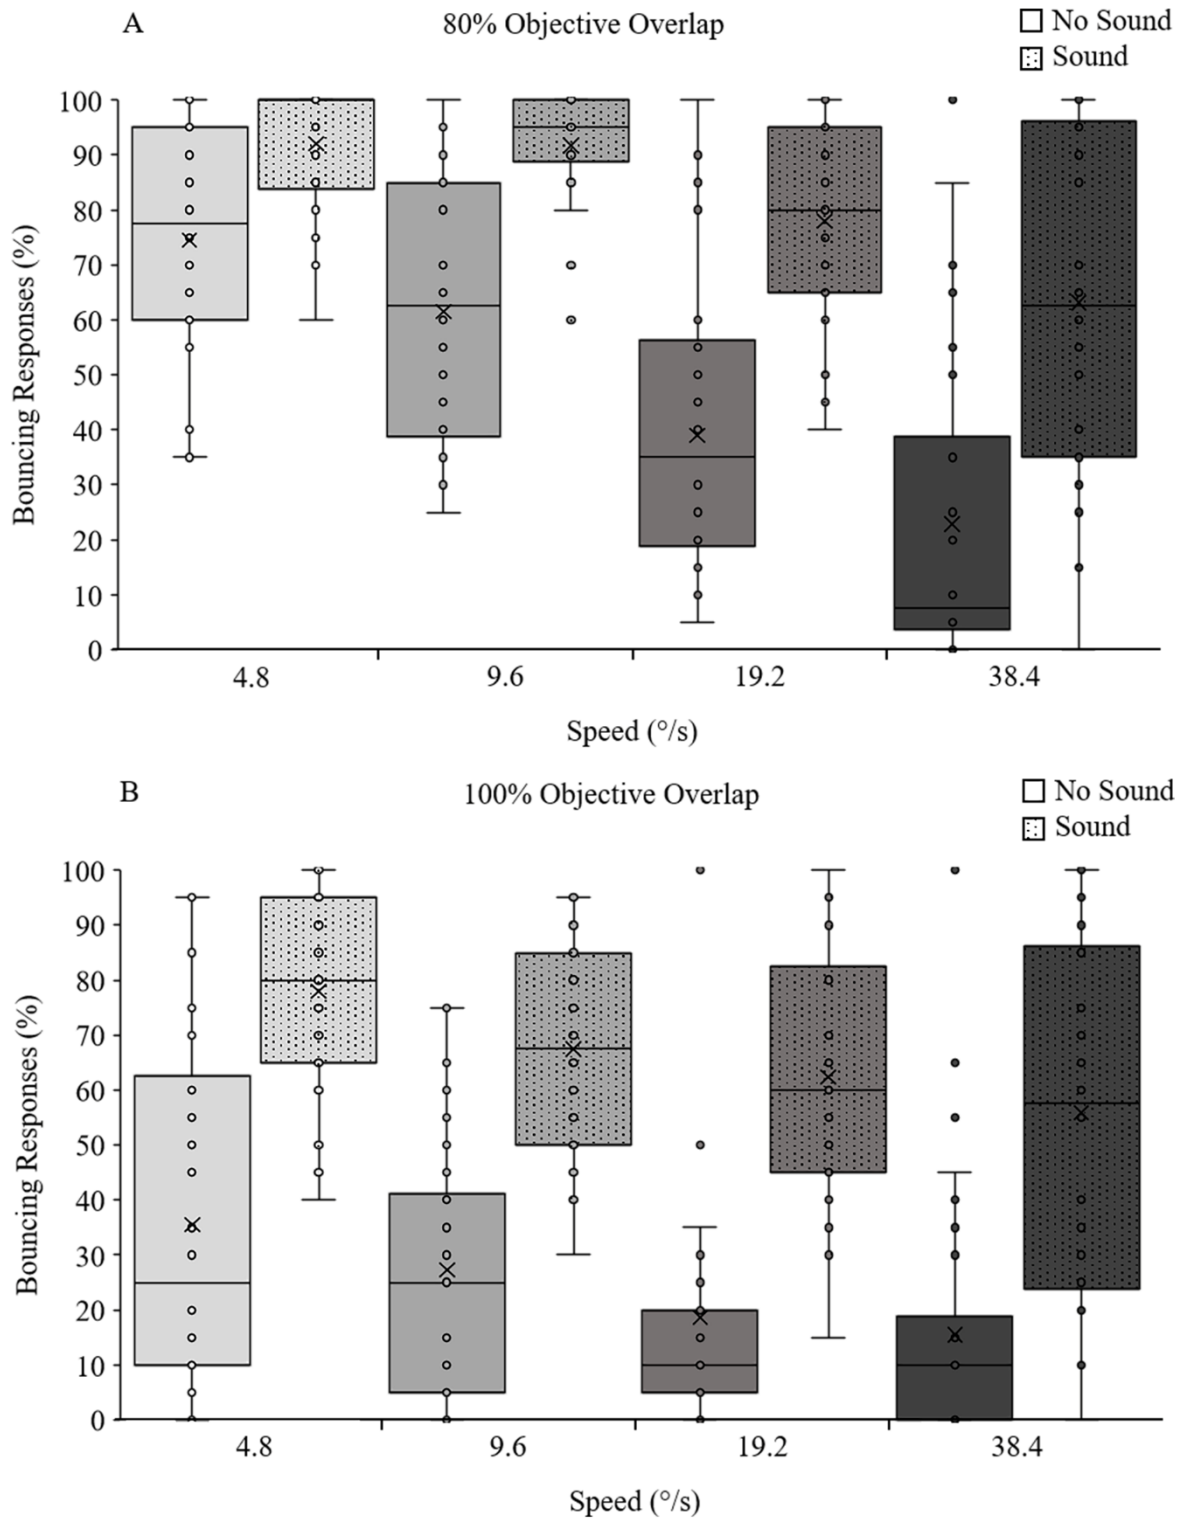

**Figure S2.** Box and whisker plots of data in Experiment 2. Boxes represent the interquartile range; middle line represents the median; whiskers represent highest and lowest scores (excluding outliers); and X's represent the mean. (A) Percentage of bouncing responses as a function of speed and sound presence at 80% objective overlap. (B) Percentage of bouncing

responses as a function of speed and sound presence at 100% objective overlap. Solid boxes represent no-sound conditions, speckled boxes represent sound conditions. Dots represent individual data points (some may be overlapping).
